# Supplementary material
Source: MDPI journal article supplement (https://www.mdpi.com/2073-4344/12/1/58)
Supplement: s1 [file s1 › catalysts-1511767-supplementary.pdf]

## Article

# A Nickel Coated Copper Substrate as a Hydrogen Evolution Catalyst

Poshan Kumar Reddy Kuppam <sup>1</sup>, K. M. M. D. K. Kimbulapitiya <sup>2,3</sup>, Srikanth Vuppala <sup>4,\*</sup>, Kuangye Wang <sup>3</sup>, G. Phaneendra Reddy <sup>5</sup>, Krishna P. Pande <sup>6,\*</sup>, Po-Tsung Lee <sup>1,\*</sup> and Yun-Lun Chueh <sup>4</sup>

<sup>1</sup> UST-IPP, College of Electrical and Computer Engineering, National Yang Ming Chiao Tung University, Hsinchu 30010, Taiwan; poshank.ee04@nycu.edu.tw

<sup>2</sup> Department of Physics, National Sun Yat-sen University, Kaohsiung 80424, Taiwan; supunbcc@gmail.com

<sup>3</sup> Department of Materials Science and Engineering, National Tsing Hua University, Hsinchu 30010, Taiwan; wangkuagye911101@gmail.com

<sup>4</sup> Department of Civil and Environmental Engineering, Politecnico di Milano, Piazza Leonardo da Vinci, 32, 20133 Milan, Italy; ylchueh@mx.nthu.edu.tw

<sup>5</sup> Department of Physics, Sri Venkateswara Vedic University, Tirupati 517 502, India; phaneendra369@gmail.com

<sup>6</sup> International College of Semiconductor Technology, National Yang Ming Chiao Tung University, Hsinchu 30010, Taiwan

\* Correspondence: srikanth.vuppala@uniroma1.it (S.V.); kppande@nctu.edu.tw (K.P.P.); potsung@mail.nctu.edu.tw (P.-T.L.)

## Supplementary Materials

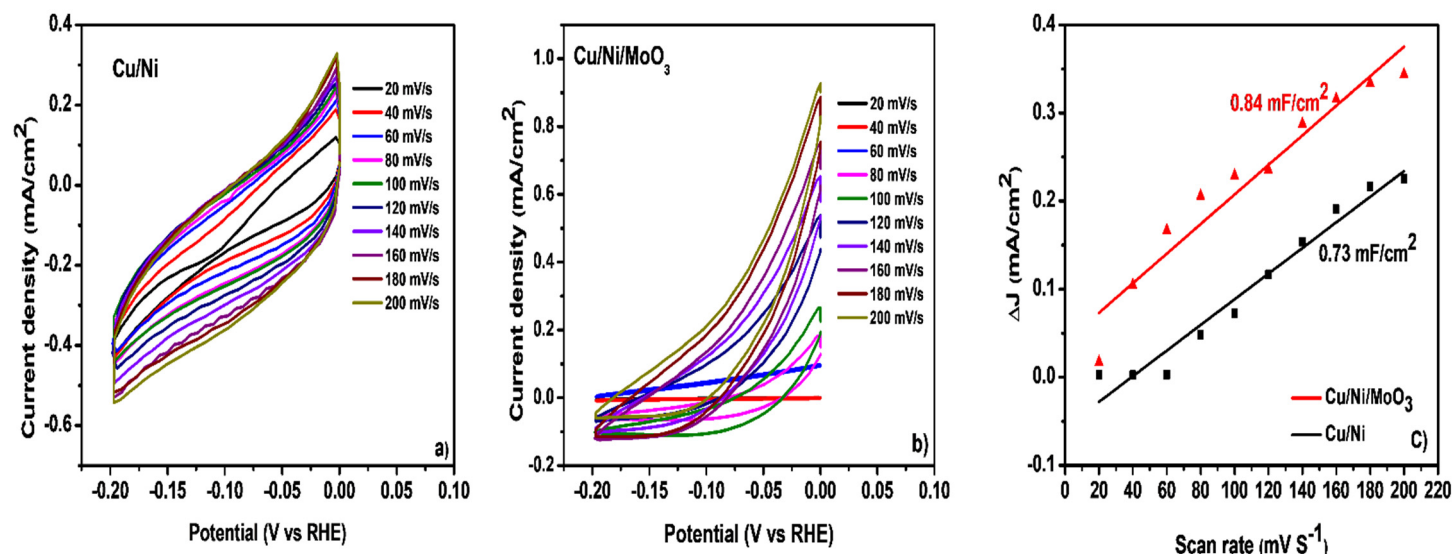

**Figure S1.** Cyclic voltammograms at different scan rates in the potential range of 20–200 mV/s in 0.1 M KOH solution with (a) Cu/Ni and (b) Cu/Ni/MoO<sub>3</sub> (c) measured Capacitive currents.

Cyclic voltammograms of Cu/Ni and Cu/Ni/MoO<sub>3</sub> were acquired at different scan rates of 20–200 mV/s in the voltage between −0.2–0 V (vs RHE) as shown in Figure S1 a and Figure S1. b. To evaluate the double layer capacitance ( $C_{dl}$ ),  $\nabla J$  ( $\nabla J = J_{anodic} - J_{cathodic}$ ) vs scan rate was recorded at −0.1 V vs RHE and  $C_{dl}$  was calculated by taking half of the slope for both Cu/Ni and Cu/Ni/MoO<sub>3</sub> samples. As shown in Figure .c,  $C_{dl}$  for Cu/Ni is 0.73 mF/cm<sup>2</sup> while Cu/Ni/MoO<sub>3</sub> shows higher value at 0.84 mF/cm<sup>2</sup>. These values are directly proportional to the electrochemical active surface area (ECSA) leading to the lower overpotential and Tafel slope of Cu/Ni/MoO<sub>3</sub>.
